# Supplementary material for: Pd nanoparticles supported on amino-functionalized magnetic mesoporous silica nanotubes: a highly selective catalyst for the catalytic hydrodechlorination reaction
Source: Royal Society of Chemistry journal article supplement (doi:10.1039/c6ra13807a), 2016-01-01
Supplement: c6ra13807a1.pdf [file c6ra13807a1.pdf]

## Supporting Information

### Pd Nanoparticles Supported on Amino-Functionalized Magnetic Mesoporous Silica Nanotubes: A Highly Selective Catalyst for the Catalytic Hydrodechlorination Reaction

Shiling Zhao, Chang Zhao, Xinzhe Li, Feng Li, Lixin Jiao, Wenbin Gao, Rong Li\*

State Key Laboratory of Applied Organic Chemistry, The Key Laboratory of Catalytic Engineering of Gansu Province and Chemical Engineering, College of Chemistry and Chemical Engineering, Lanzhou University, Lanzhou, 730000, P. R. China. E-mail: [liyirong@lzu.edu.cn](mailto:liyirong@lzu.edu.cn).



**Fig. S1** Plots of  $\ln(C_0/C)$  versus reaction time for the HDC of 4-CP over different amounts of Pd@NH<sub>2</sub>-MSNTs catalyst.



**Fig. S2** Plots of  $\ln(C_0/C)$  versus reaction time for the HDC of 4-CP at different temperatures.



**Fig. S3** Hot filtration test for the Pd@NH<sub>2</sub>-MSNTs catalyzed HDC reaction of 4-CP.



**Fig. S4** HDC reaction at 60 °C of 4-CP with (a) Pd/C, (b) Pd/mSiO<sub>2</sub>, (c) CNTs/Fe<sub>3</sub>O<sub>4</sub>@SiO<sub>2</sub>-NH<sub>2</sub>-Pd and (d) Pd@NH<sub>2</sub>-MSNTs.



**Fig. S5** HDC of different chlorophenols with Pd@NH<sub>2</sub>-MSNTs catalyst: (a) 2-CP, (b) 3-CP, (c) 2,4-DCP, (d) 2,4,6-TCP.
